# Supplementary material
Source: PubMed Central journal article supplement (PMC4907107)
Supplement: JB.00203-16_zjb999094088so1.pdf [file JB.00203-16_zjb999094088so1.pdf]

|                           |     |                                                                  |
|---------------------------|-----|------------------------------------------------------------------|
| <i>R. sphaeroides</i>     | 44  | GIPEGLMEAIARVESGR----GGR---AWPWTLNQGGRGMFFETRAEA VRMLKSTVASGVSN  |
| <i>R. mucosus</i>         | 37  | GLPKGLLRRAIARTESGRAQKGAGA--AWWTSNVRGKGYYSKGQEA LTHLRQLVARGVRG    |
| <i>P. temperata</i>       | 37  | GLPQHLLPAIARIESGRSL--NGKRK-AWPWALNHAGKGLYFETKSSALDYLTATATGRTN    |
| <i>G. oxydans</i>         | 41  | GIPPRLLDAISRVESGRRD-PNGTATVAWPWTVNAAGKGYFYESRDEAIAAVRDFQAHGIVS   |
| <i>A. okinawensis</i>     | 52  | HIPDGFLSAMGRVESGRTE-SDGTVS-AWPWTINAGGI GYHNSRAEA VAAVQSFRRQGGIMS |
| <i>R. elongatum</i>       | 58  | GVPRDILFLIARLESGR--GRDGQL-APWPWTLNIA GRGYWIDHTHEALARLQAYLSTGRRN  |
| <i>T. pusilla</i>         | 42  | NIPRNLLRAISLTESGRWVKEDKANI-AWPWTVASGKA GEYFPTKTD AIRHVRQLQAQGVTN |
| <i>R. aerilata</i>        | 37  | GIPAGLLAAI GRVESGRRDPATGEQG-PWPWTMNAEGRGKFFPSKAEAVAEVQQLRAGGMRI  |
| <i>R. cervicalis</i>      | 14  | SLPAGLLAAI GRVESGRREG--GRTD-PYPWTINAEGRGSMFSPKPAIAIAVQALQAGGMRS  |
| <i>R. litoralis</i>       | 48  | NVPLSVLKAIARTESGITV-NDA--FTPWPWTVNSEGRGVRFS SAEEAIEYVGLNRQRGVSN  |
| <i>R. denitrificans</i>   | 48  | DVPLSVLKAIARTESGITV-DDQ--FAPWPWTVNSEGRGVRFS SAEEAIEYVGLNRQRGVSN  |
| <i>K. baliensis</i>       | 43  | HLPYRLLLEAISKIESGRRDPIAGLQ--AWPWTINAQQGGYFYRNKAE AIAAAQDFRAHGIES |
| <i>R. rubrum</i>          | 48  | GFPEHMLTAISLVESGRWDR-DLRARIAWPWTVMAEGRGRFFQTKAEALAEVRLLOAKGVAN   |
| <i>A. prunellae</i>       | 76  | HIPDGFLYAI SRVESGKKDG-DGRLT-AWPWTIMANGTGHYYTTRSDA INAAAEFRQQGITS |
| <i>A. astilbis</i>        | 34  | HIPDGFLYAI SRVESGKTDS-SGHLS-AWPWTIMASGVGHYYQSKSEAVAAAAEFRAQGVTS  |
| <i>P. lavamentivorans</i> | 61  | GLPRALLAAVALAESGRYSPTTRKAR-AWPWTINAEGRPYFQTKQEA IATTQRLLDGGMRS   |
| <i>R. prowazekii</i>      | 103 | NIPSNALYSIALKESGKKHSTRK-IKVVWPWTVNVEGKGYFNSKREAINFVRIELIKGRDS    |
| <i>R. canadensis</i>      | 39  | NIPSNLTHSIALKESGKQHTTHK-IRVVWPWTVNVRGKGYFNKREAVRFVRIELIKGNES     |
| <i>P. molischianum</i>    | 49  | GIPSGLLQSI SILESGRYDSSRR-ATIAWPWTVMAEGEGRYLPTKAA AIAEVRRLKARGVQN |
| <i>N. itersonii</i>       | 123 | GLPRNLLTALSHVESGRWDDARE-AKVAWPWTVMAEGRGRYFRTKAE AIAEVRRLQAKGVKN  |
| consensus                 |     | GIP--LL-AI-R-ESGR-----G----AWPWT-NA-G-G-YF--K-EAIA-V-----A-G--S  |

**Motif**

|                            |    |                                                                    |
|----------------------------|----|--------------------------------------------------------------------|
| consensus                  |    | GVP-DVL-AI-LTETGR-----G----PWPWTVNMEG-G-WF-----EA--YVF--FKRG--S    |
| <i>P. inhibens</i>         | 44 | GVPLDVLRAITRTEETGRGGKQ-GLQ--PWPWTVNMEGAGKWFQTEDEARAYVFSHFKRGARS    |
| <i>R. halocynthiae</i>     | 44 | GVPLAVLRAIARVETGRVRD--GRLE-PWPWTINVEGQGYWFTSEFEAKTYVFNIFKAGKRS     |
| <i>R. conchae</i>          | 42 | GVPLDVLRAIARVETGRRLD--GRLE-PWPWTVNRDQGGYWFASEVEAKSYVFDIFKSGTRS     |
| <i>S. lacuscaerulensis</i> | 45 | GVPLDVMQAITRVEETGRRVD--GSLH-PWPWTVNLEGGKGYWFASEAEAKAYVFEVFKSGARS   |
| <i>P. aminophilus</i>      | 56 | GVPPDILMTLTLTETGRKLN--GALR-PWAWSVNVGGE GHWFEDPQSAIRFVEDRVAQQSN     |
| <i>H. massiliensis</i>     | 40 | GVPASVLRRAISLLETGRRQG--GRFQ-SWPWTVNMEGEGRWFEDTP-EAALYVRQEFARGARS   |
| <i>T. pacifica</i>         | 14 | GVPSVLRKAI SLSETGRKSE--GSFR-PWPWTVNMEGEGHWFETRDEALRYVFKKEYKRGARS   |
| <i>A. mucosum</i>          | 36 | GVPI SVLRKAI SLSETGRKRG--GKMR-PWPWTVNMEGKGVWFDSHAELLDYAQTHHARGARS  |
| <i>L. nanhaiensis</i>      | 43 | DVPPDVLRAISRAETGRGGKG-GLR--PWPWTVNMEGTGKWFNSEDEARAYVFKHFKRGARS     |
| <i>R. pomeroyi</i>         | 48 | GVPLDVLRAITRVEETGRRS--GQLA-PWPWTVNMEGTGHWFPEFAARKVFFERFKSGARS      |
| <i>T. dalianensis</i>      | 45 | KVPI SVLRKAI SLLETGRKRD--GTFR-PWPWTVNMEGAGHWFEDTRDEALRYVFREYKRGARS |
| <i>P. halophilus</i>       | 61 | GVPADILGALTLTETGRRLD--GVVR-PWAWSANAEGETWFDPPVSAIAFAEDRVARGRTN      |
| <i>O. guishaninsula</i>    | 6  | GVPPDVLMAISLLETGRKQN--GRTT-AWPWTVNTEGKGTWFDDYGAALSARQSQAGARS       |
| <i>R. capsulatus</i>       | 48 | GVPSVLRKAI SLLETGKKID--GKLR-PWPWTVNMEGAGHWFEDTLDEARAYVQEFKRGARS    |

|                           |     |                                                                     |
|---------------------------|-----|---------------------------------------------------------------------|
| <i>R. sphaeroides</i>     | 98  | IDVGCMLNWRWHAPAFASADEMIDPVRNTRHAARFLRELRLARLGSWEAATAAYHSADRGRGAAY   |
| <i>R. mucosus</i>         | 97  | FDVGCMLNWRWHGDNFANLDEMIDPARNTEYAAARFLSELRAETGSWDAATRYHSRDPRRGAAY    |
| <i>P. temperata</i>       | 96  | IDVGCMLNHYWHSQEFKSLEQIMIDPVQNVTYAAKFLRQLYRQHGSWADAVQHYHSPDENRGKRY   |
| <i>G. oxydans</i>         | 102 | IDVGCMLNHHHPDAFFSLEDADFDPYSNARYGARFLSGLHNLQGWPAATAAYHSLTPALGADY     |
| <i>A. okinawensis</i>     | 109 | IDVGCMLNQLQHPDAFSPVDQAFDPLRNAMYAGSFLLMQYKMGSWPRAAAAYHSQTPGIGTPY     |
| <i>R. elongatum</i>       | 117 | VDVGCFQVNRWHAEGFASAAAMLDPANARYAARFLARLHRELGDWTA AVAAAYHSRTPDHAARY   |
| <i>T. pusilla</i>         | 103 | IDVGCMLNLRYPHEAFKNLDDAFDPLYLNTNYAGDFLARLFKTKSWSAAGRYHSDPDRGLY       |
| <i>R. aerilata</i>        | 98  | IDVGCMLNLYHANAFAASLDEAFDPLANARYAARFLKDLQANAGDWMVAAGHYHSTPGRADAY     |
| <i>R. cervicalis</i>      | 136 | IDVGCMLNLRHHPDAFASLEQAFDPLANARYAARFLTELYAPRQDWARAAAYHSTPTEYAAPY     |
| <i>R. litoralis</i>       | 108 | IDIGCFQINRYKWHGANFSSVQEMFNPYQNALYAANFLASLHDEFEDWTKAAGAYHSRTTAHSDLY  |
| <i>R. denitrificans</i>   | 107 | IDIGCFQINRYKWHGANFSSVQEMFNPYKALYAANFLTSLYNEFEDWTKAAGAYHSRNTEHSDLY   |
| <i>K. baliensis</i>       | 103 | IDVGCMLNHHHPDAFASLDDAFDPLRNARYGAHFISELFGRLHSSWAAAGAYHSLTPQEGEY      |
| <i>R. rubrum</i>          | 109 | IDVGCMLNLRYPHGGAFSLDEAIDPANARYAASFLRRLFDNDWAEAVTAYHSLTEVYAQRY       |
| <i>A. prunellae</i>       | 136 | IDVGCMLNQLQHPDAFSSLDQAFDPLVNALFAGHFLVQLHDKTGSWPRAAAYHSTPGLGTPY      |
| <i>A. astilbis</i>        | 94  | IDVGCMLNQLQHPDAFSSLDQAFDPLVNALYAGRFLIQMHDKMGSWPRAAAAYHSTPGLGAPY     |
| <i>P. lavamentivorans</i> | 121 | IDVGCMLNLRYPHDAFISLEDGFDPMNTVAYGAEFLMRLHERAGSWEKAVAHYHSTASRGGRY     |
| <i>R. prowazekii</i>      | 164 | IDVGCMLNLRHLEAFNSLDQAFDPLHNIRYGAELFRSKYDQLGSHWKAIAHYHSHALGVKY       |
| <i>R. canadensis</i>      | 110 | IDVGCMLNLRHLEAFNSLEQAFDPLHNIRYGAELFRSKYDQLGSHWKAIAHYHSHANYSLGFQY    |
| <i>P. molischianum</i>    | 111 | IDVGCMLNLRYPHTAFADLDDAFDPAANVAYAARFLSGLHEATGHWPAAASYHSTPPLAAAY      |
| <i>N. itersonii</i>       | 185 | IDVGCMLNLMYHGDAFESLEDADFDPASNVGYAVEFLTNLYEETGAWTRAAATRYHSA TEVHAVRY |
| consensus                 |     | IDVGCMLNLR--H--AF-S-D-AFDP--NA-YAA-FL--L----GSW--AAAAYHS-TP--G--Y   |

**Motif**

|                            |     |                                                                     |
|----------------------------|-----|---------------------------------------------------------------------|
| consensus                  |     | FDVGCFQINRYWHG--F-SID-MFDP--NA-YAARFL--LY-E-G-W--AAGAYHSRT---A-RY   |
| <i>P. inhibens</i>         | 103 | FDVGCFQINFKWHGQAFDSIDQMFDPANAYAARFLRELHDEFGDWSQAAGAYHSRTPTYANRY     |
| <i>R. halocynthiae</i>     | 106 | FDIGCFQINRYWHGKAFRSIDAMFDPDENATYAARFLKELHAEELGSWPAAVGAYHSRTPSLAHAY  |
| <i>R. conchae</i>          | 104 | FDVGCFQINRYWHGKAFRSIDAMFDPDENAYAARFLSGLYAEELGSWPAAVGAYHSRTRRHAAAY   |
| <i>S. lacuscaerulensis</i> | 104 | FDVGCFQINRYWHGKAFRSIDAMFDPDQNAAYARFLKQLYAEHGDWSAAAGAYHSRTPEYARRY    |
| <i>P. aminophilus</i>      | 116 | LDLGCFLNWRWHGQFNTSATQMFDPLENARYAARFLVSDLYLESNGNWRMAAGNFHSRTQVYSDRY  |
| <i>H. massiliensis</i>     | 99  | FDVGCFQINRYWHGDAFETVEEMFDELGNALYAARFLSDLYGEFGSWSAAGAFHSRTPEYARRY    |
| <i>T. pacifica</i>         | 70  | FDIGCFQINRYKWHGENFSSIEEMFDPNSARYAARFLRELHNEKMDWSRAAGAYHSRTQSHAERY   |
| <i>A. mucosum</i>          | 95  | YDVGCFQLNFKWHGHNFSSIEEQMIQPDANALYAARFLLELYREKGNWTDAAAGAYHSRTPKYANKY |
| <i>L. nanhaiensis</i>      | 101 | FDVGCFQVNYKWHGTAFRSIDEMFDPMLNADYAARFLRGLYDEFGDWSAAAGAYHSRTPTYARSY   |
| <i>R. pomeroyi</i>         | 108 | FDVGCFQINRYWHGQFSSIEEMFDPERNADYAARFLNDFELGELGSWAAAGAYHSRTQSLADAY    |
| <i>T. dalianensis</i>      | 105 | FDVGCFQINFKWHGQFASIEEMFDPANGRYAARFLRELYEELGDWTAAGAFHSRTKIHADRY      |
| <i>P. halophilus</i>       | 121 | IDIGCFQINRYWHGQNFASIEQMFDPLENARYAARFLVHQLYRESGDWRKAAGMFHSRTSVYAQRY  |
| <i>O. guishaninsula</i>    | 66  | FDVGCFQINRYWHGQHFASLDAMFDPVNLARYAARFLSNLHAEYGDWQAAGAFHSRTEVHAARY    |
| <i>R. capsulatus</i>       | 105 | FDIGCFQINRYKWHNEHFSSIDEMFDPKANALYAARFLSDLYAETGSWNAAGAYHSRTKEHADRY   |

**Supplemental FIG 1.** Identification of consensus motifs in the alignment of known and hypothetical SltF homologs. The known and hypothetical amino acid sequences of the LT domains of SltF and its homologs identified in the genome database for the  $\alpha$ -Protoeobacteria were aligned. Residues in bold, and highlighted in yellow denote over 50% and 80% identity, respectively; red font denotes invariant residues, and the asterisks identify the putative catalytic Glu residues. The consensus motifs are presented below and above the two subsets of aligned sequences, respectively. Abbreviations for bacteria and sequence accession numbers in parentheses are: *Rhodobacter sphaeroides* (NC\_007493), *Roseovarius mucosus* (NZ\_KN293980), *Planktomarina temperata* (WP\_052377022), *Gluconobacter oxydans* (NC\_006677), *Acetobacter okinawensis* (NZ\_BAJU01000118), *Roseibacterium elongatum* (NZ\_CP004372), *Terasakiella pusilla* (NZ\_JHYO01000012), *Roseomonas aerilata* (NZ\_JONP01000009), *Roseomonas cervicalis* (NZ\_GG771252), *Roseobacter litoralis* (NC\_015730), *Roseobacter denitrificans* (NC\_008209), *Kozakia baliensis* (NZ\_JNAB01000023), *Rhodospirillum rubrum* (NC\_007643), *Asaia prunellae* (NZ\_BAJV01000004), *Asaia astilbis* (NZ\_BAJT01000016), *Parvibaculum lavamentivorans* (NC\_009719), *Rickettsia prowazekii* (NC\_000963), *Rickettsia canadensis* (NC\_009879), *Phaeospirillum molischianum* (NZ\_CAHP01000001), *Novispirillum itersonii* (NZ\_KB907344), *Phaeobacter inhibens* (NC\_018290), *Ruegeria halocynthiae* (NZ\_JQEZ01000003), *Ruegeria conchae* (NZ\_AEYW01000017), *Silicibacter lacuscaerulensis* (NZ\_GG704596), *Paracoccus aminophilus* (NC\_022041), *Haematobacter massiliensis* (NZ\_JGYG01000003), *Thioclava pacifica* (NZ\_AUND01000012), *Actibacterium mucosum* (NZ\_JFKE01000001), *Leisingera nanhaiensis* (NZ\_KI421509), *Ruegeria pomeroyi* (NC\_003911), *Thioclava dalianensis* (NZ\_JHEH01000011), *Paracoccus halophilus* (NZ\_JRKN01000018), *Oceaniovalibus guishaninsula* (NZ\_AMGO01000047), *Rhodobacter capsulatus* (NC\_014034).

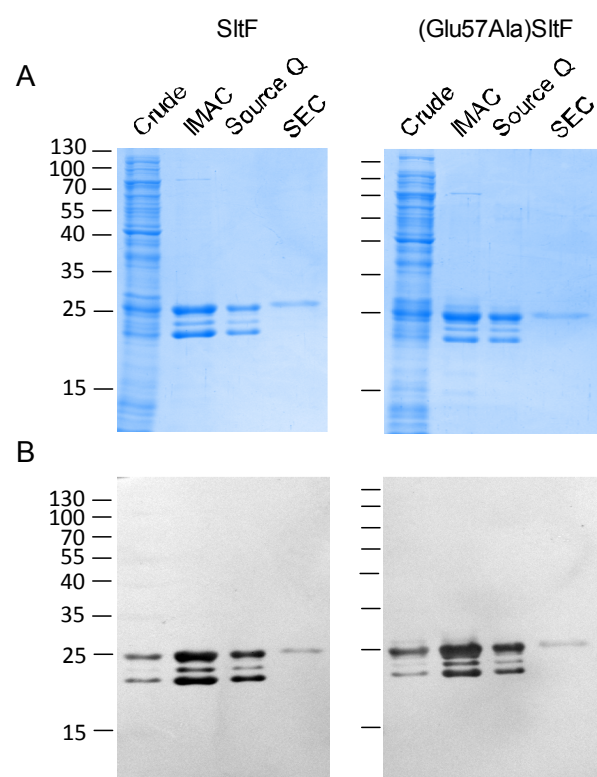

**Supplemental FIG 2.** Purification of wild-type- and (Glu57Ala)-SltF. SDS PAGE with (A) Coomassie Brilliant Blue staining and (B) Western immunoblot analysis (using anti-His<sub>6</sub> primary antibody) of the respective enzymes purified by immobilized-metal affinity chromatography (IMAC) on Ni<sup>2+</sup>-NTA agarose, anion-exchange chromatography on Source 15Q, and size-exclusion chromatography (SEC) on HiLoad 16/600 Superdex 200pg. The mass (kDa) of molecular weight markers are indicated on the left. The apparent mass of the recombinant SltF is 25.04 kDa, but it is susceptible to limited proteolysis within its C-terminal non-catalytic domain generating two catalytically-active, truncated forms of the enzyme (21) with apparent masses of 23 and 20.4 kDa; these can be separated by SEC.

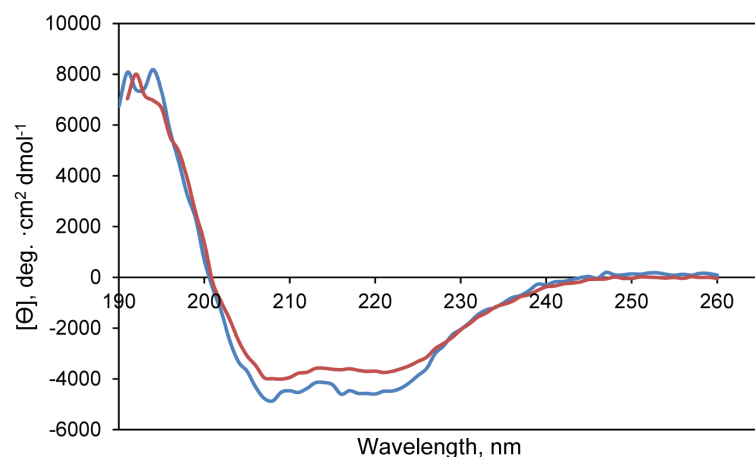

**Supplemental FIG 3.** CD analysis of wild-type- (red) and (Glu57Ala)- (blue) SltF. The spectra of proteins (0.2 mg·ml<sup>-1</sup>) in 5 mM sodium phosphate buffer, pH 7 were recorded in a 0.1 cm path length cell at an internal temperature of 25 °C. The data were recorded as an average of four accumulations at each wavelength with a scan speed of 50 nm·min<sup>-1</sup> (bandwidth of 1 nm and data pitch of 1 nm).
